1  
2  
3  
4  
5  
6  
7  
8  
9  
10  
11  
12  
13  
14  
15

**Acid and Iron Experimental Evolution of *Halobacterium* sp. NRC-1**

by

Karina S. Kunka,<sup>a</sup> Jessie M. Griffith,<sup>a</sup> Chase Holdener,<sup>a</sup> Katarina M. Bischof,<sup>a</sup> Haofan Li,<sup>a</sup> Priya DasSarma,<sup>b</sup> Shiladitya DasSarma,<sup>b</sup> and Joan L. Slonczewski<sup>a#</sup>

<sup>a</sup>Department of Biology, Kenyon College, Gambier, Ohio, USA.

<sup>b</sup>Institute of Marine and Environmental Technology, Department of Microbiology and Immunology, University of Maryland School of Medicine, Baltimore, Maryland, USA

<sup>#</sup>Corresponding Author:

Joan L. Slonczewski, [slonczewski@kenyon.edu](mailto:slonczewski@kenyon.edu)

Department of Biology, Kenyon College, Gambier, Ohio, USA

16 ABSTRACT

17 *Halobacterium* sp. NRC-1 (NRC-1) is an extremely halophilic archaeon that is well  
18 adapted to multiple stressors such as UV, ionizing radiation, and arsenic exposure. We conducted  
19 experimental evolution of NRC-1 under acid and iron stress to expand the stressors. NRC-1 was  
20 serially cultured in CM+ medium modified by four stress conditions, with four evolving  
21 populations per condition. At 500 generations the conditions were: optimal pH (pH 7.5), acid  
22 stress (pH 6.3), iron stress (600  $\mu$ M ferrous sulfate, pH 7.5), and acid plus iron stress (600  $\mu$ M  
23 ferrous sulfate, pH 6.3). 16 clones from the 500<sup>th</sup> generation were isolated and characterized for  
24 phenotypic changes, and the genomes of the evolved clones were sequenced. Genotypic analysis  
25 of all 16 clones revealed 378 mutations, with patterns of high variability arising from movement  
26 of insertion sequences (ISH elements) and large deletions. One minichromosome (megaplasmid)  
27 pNRC100 had increased copy number. The 500-generation clones had frequent loss of gas  
28 vesicles and arsenic resistance. An acid-evolved clone had increased fitness compared to the  
29 ancestral stock, when cultured at low pH. Seven of eight acid-evolved clones had a mutation in  
30 or upstream of *nhaC3*, encoding a sodium-proton antiporter that exports sodium and takes in  
31 protons; no non-acid adapted strains had *nhaC3* mutations. Two acid-adapted strains shared a  
32 common mutation in *bop*, encoding the bacteriorhodopsin light-driven proton pump. Mutations  
33 also affected the *arcR* regulator of arginine catabolism, which can mediate proton transport.  
34 Thus, in the haloarchaeon NRC-1, as in bacteria, pH adaptation was associated with genes  
35 affecting proton transport.

36 IMPORTANCE

37 Thus far, few studies of experimental evolution have been conducted in archaea.  
38 Haloarchaea are polyextremophiles capable of growth under environmental conditions such as  
39 concentrated NaCl, high doses of ionizing and UV irradiation, and desiccation. *Halobacterium*

40 sp. NRC-1 (NRC-1) is considered a model organism for the feasibility of microbial life on Mars.

41 Our experimental evolution of NRC-1 adaptation to iron and acid stress may yield clues as to

42 how microbes could adapt to the ancient Martian conditions of iron-rich, acidic brine. Interesting

43 parallels were found between the molecular basis of pH adaptation in NRC-1 and in bacteria.

44

45 INTRODUCTION

46

47 *Halobacterium sp.* NRC-1 (NRC-1) is a polyextremophile that grows optimally at NaCl

48 concentrations in excess of 4 molar (1). A genetically tractable model microbe (2), it was the

49 first halophilic Archaeon with a fully sequenced genome (3). Besides high salt, NRC-1 is

50 capable of surviving high doses of ionizing radiation and dessication (4), UV radiation (5),

51 temperature extremes (6), and toxic ions such as arsenite (7). These traits have made NRC-1 a

52 model for studying the possibility of life on Mars (8–10), by subjecting cells to stressors in the

53 laboratory and environmental conditions such as the stratosphere (11, 12).

54 Water on Mars contains high concentrations of salt, as well as acid and iron (13). The

55 Mars Exploration Rover Opportunity discovered substantial deposits of an iron hydrous sulfate

56 mineral known as jarosite [ $\text{KFe}^{3+}_3(\text{OH})_6(\text{SO}_4)_2$ ] which on Earth forms in acidic and iron-rich

57 aqueous environments such as acid mine drainage and near volcanic vents. Opportunity's

58 discovery of jarosite on Mars was evidence of acidic, liquid water and an oxidizing atmosphere

59 in the Martian past (13, 14). Acid and metals can amplify the stress associated with each

60 condition (15). It is of interest to investigate how a neutralophilic halophile such as NRC-1 (16)

61 might adapt to acid and iron stress.

62 An informative approach to examine the genomic basis of stress response is experimental

63 laboratory evolution (17–23). Experimental evolution of bacteria reveals changes in phenotype

64 and genotype in response to specific stressors in a controlled environment, such as carbon source

65 limitation or extreme pH. In bacterial adaptation to various kinds of pH stress, we find a

66 recurring pattern that dominant responses to short-term stress actually decrease fitness over many

67 generations of long-term exposure. For example, amino-acid transport and catabolism play

68 important roles in extreme-acid survival of *Escherichia coli* (24, 25). But 2,000 generations of *E.*

69 *E. coli* evolution at pH 4.8 select for loss of three acid-inducible amino-acid decarboxylase systems  
70 (21). A membrane-permeant acid, benzoic acid induces glutamate decarboxylase and drug  
71 resistance regulons; yet these systems are lost or downregulated during experimental evolution  
72 (Moore et al. 2019 AEM00966-19) (20). At high external pH, *E. coli* survival requires the stress  
73 sigma RpoS; yet generations of growth at high pH selects against RpoS expression and activity  
74 (26). It was of interest to see whether similar patterns of reversal are found in archaea.

75         Relatively few experimental evolution studies have been reported in archaea. In NRC-1,  
76 serial killing doses of ionizing radiation led to more tolerant mutants with upregulation of a  
77 single-stranded DNA binding protein operon (27). In the thermoacidophile *Sulfolobus*  
78 *solfataricus*, serial passage in extreme acid yielded strains that grow below pH 1 (28). These  
79 strains showed mutations in amino acid transporters, as well as upregulation of membrane  
80 biosynthesis and oxidative stress response. In *Metallosphaera sedula*, serial passage led to a pH  
81 0.9-adapted strain with four mutations, one of which is an amino-acid/polyamine transporter  
82 (29). These findings are intriguing, given the role of amino-acid transport and catabolism in  
83 extreme-acid survival of bacteria (24, 25).

84         In archaea and in bacteria, various pH responses involve proton transport via primary  
85 pumps as well as antiporters (24, 30, 31). *Halobacterium* strains possess a light-driven proton  
86 pump, bacteriorhodopsin, that generates proton motive force (PMF) (32, 33). NRC-1 has five  
87 sodium-proton antiporters, which export sodium in exchange for protons (6). In alkaliphilic  
88 *Bacillus* species (34) and in *Escherichia coli* (35) sodium-proton antiporters mediate responses to  
89 high pH.

90         We conducted experimental evolution of NRC-1 under conditions of high iron versus low  
91 iron, at low pH (pH 6.5-6.3) and at optimal pH for growth (pH 7.5). The NRC-1 genome

92 includes a main chromosome and two minichromosomes or megaplasmiids (3, 36) . It  
93 accumulates frequent IS mutations (37, 38) which may mediate rapid adaptations to  
94 environmental stress. Our study of experimental evolution in a haloarchaeon assesses which  
95 mutations contribute to archaeal evolution in iron and acid stress. Here we describe analysis of  
96 phenotypic changes across evolved clones from each population in gas vesicle formation,  
97 motility, and growth under the four conditions, and then use genomic analysis to identify  
98 potential underlying mutational bases of these phenotypic responses to selection. Genome  
99 analysis of 16 clones revealed numerous insertions and deletions mediated by insertion  
100 sequences (ISH). Of special interest, we identify two loci whose mutations occur in acid-adapted  
101 strains, namely *nhaC* ( $\text{Na}^+/\text{H}^+$  antiporter) (6) and *bop* (bacteriorhodopsin) (32, 33).

102 RESULTS

103

104 **Experimental evolution under conditions of acid and iron stress.** Serial culture of  
105 evolving populations was conducted as described under Methods. Populations of NRC-1 were  
106 founded from a single clone and cultured in modified CM<sup>+</sup> medium (2, 3) with appropriate  
107 buffers to maintain pH. Each population was diluted 500-fold every four days (approximately 9  
108 generations). Four independent populations were maintained for each condition: the optimal  
109 growth condition, pH 7.5 (designation M); acid stress, initially pH 6.5, later pH 6.3 (designated  
110 J); iron stress, pH 7.5 amended with 600  $\mu$ M ferrous sulfate (designated S); and acid with iron  
111 amendment (designated K) for a total of 16 experimental populations. Populations evolved under  
112 acid stress were cultured at an initial pH of 6.5, which was then lowered to 6.3 as the populations  
113 adapted, at generation 250.

114 After reaching 500 doublings, two clones were isolated from each population by three  
115 rounds of streaking on CM<sup>+</sup> agar for a total of 32 evolved clones. Genomic DNA was extracted  
116 from 16 of these clones, and from the founder stock of NRC-1. DNA samples were sequenced by  
117 Illumina MiSeq, and mutations were identified by comparison of the “evolved strain” sequences  
118 to that of the NRC-1 ancestral stock, assembled on the reference genome (3) using the *breseq*  
119 pipeline (39–41). The strains we characterized are listed in **Table 1**.

120 **Mutations in the genomes from evolving populations.** The genomes of the 16 clones  
121 were compared to those of the resequenced NRC-1 ancestor (**Tables S1, S2, S3**). The genomes  
122 of the evolved clones had a total of 378 mutations, of which 349 were unique to one strain at the  
123 base-pair level. Representative mutations of interest are summarized in **Table 2**. The genome of  
124 our ancestral NRC-1 stock was also compared to that of the NCBI reference (3) as shown in

125 **Table S4**; the differences between these sequences were excluded in our analysis of the evolved  
126 clones.

127 In the 16 clones, overall, 87 mutations were found on the main chromosome. There were  
128 120 mutations in minichromosome pNRC100, and 171 mutations on minichromosome  
129 pNRC200. pNRC100 is about 10% as long as the main chromosome, and pNRC200 is about  
130 20% as long; thus, the two minichromosomes had a mutation frequency more than ten-fold  
131 greater than that of the main chromosome, a finding consistent with previous reports of plasmid  
132 mutation (3). The main chromosome and the two minichromosomes had numerous target site  
133 duplications (TSDs) caused by ISH element insertions (37), as well as large deletions also  
134 mediated by ISH mobility (**Table 3**) (42–45). For comparison, in *E. coli* the mutations selected  
135 under stress conditions often originate via insertion elements (20). In haloarchaea, ISH elements  
136 are even more active and cause numerous large-scale mutation events (46).

137 Haloarchaea including *Halobacterium salinarum* species are known for polyploidy (15-  
138 25 genome copies per cell) and for ploidy variation among replicons within a cell (47). Our  
139 evolved clones showed evidence for variable ploidy between and within replicons. Mean read  
140 coverage by replicon was modeled by *breseq* (**Table 4**). Overall, within the ancestor and the  
141 evolved clones, the read coverage for the main chromosome was consistent with that of the  
142 minichromosome pNRC200. However, the mean coverage of the shorter minichromosome  
143 pNRC100 (191 kb) was more than twice that of the main chromosome, for our ancestral NRC-1  
144 and for 12 of the 16 evolved clones. Clones J1, M3-1, K3, S2, and S3 had mean coverage of  
145 pNRC100 more than four-fold greater than that of the main chromosome. These high coverage  
146 ratios could indicate that our original NRC-1 stock has a double copy number of  
147 minichromosome pNRC100, relative to the main chromosome; and that some descendant clones



148 have increased relative copy number. However, the calculations are complicated by wide  
149 variation in read coverage between different segments of the same replicon, especially in  
150 pNRC100, likely due to internal repeats in the replicon (35). Interpretation of the data is also  
151 complicated by the presence of massive deletions (**Table S2**) which comprise up to 50% of the  
152 ancestral sequence (for example in clone K1) (45). Variation in read coverage could indicate the  
153 presence of plasmid copies with different deletion levels within a given polyploid cell.

154 **Multiple clones lost gas vesicles and arsenic resistance.** Under laboratory conditions, a  
155 gas vesicle-producing ( $Vac^+$ ) NRC-1 clones have high rates of spontaneous mutation to a  
156 vesicle-deficient ( $Vac^-$ ) phenotype due to mutations in *gvp* on pNRC100 (37, 42). 12/16 of our  
157 evolved clones, including members of all four selection classes, had lost genes required for gas  
158 vesicle nanoparticle production (*gvp*) (48–50). Cultures were oxygenated continually by rotating  
159 in a bath, effectively eliminating the competitive advantage of producing gas vesicles in oxygen-  
160 limiting environments. Thus, as expected, many insertions and deletions were found that had  
161 eliminated gas vesicles (42, 46). We characterized gas vesicle phenotypes every 100 generations  
162 for the stressed condition populations. These  $Vac$  phenotypes (loss of gas vesicle nanoparticles)  
163 are presented by population and organized by respective evolution condition in **Table 7**. All  
164 evolving populations showed loss of gas vesicle production in some cells. By generation 500, the  
165  $Vac^-$  phenotype was prevalent in all populations. There was no significant correlation with pH or  
166 with iron amendment.

167 In addition, 13/16 evolved clones had lost the major arsenic resistance operon (*ars*)  
168 encoded on pNRC100 (7). Other mutations affecting transcriptional regulators and initiation  
169 factors occurred in parallel across multiple populations. These and other parallel mutations are

170 summarized in **Table 2**, in which apparent “hot spots” for mutation are grouped based on the  
171 degree of parallelism observed.

172 **Acid-evolved clone J3-1 has a growth advantage over a range of pH values.** The  
173 clones after 500 generations of serial culture under four conditions were tested for genetic  
174 adaptation under various growth conditions. Each evolved clone was cultured in parallel with the  
175 ancestral strain NRC-1. The loss of gas vesicles ( $Vac^-$  phenotype) alters their  $OD_{600}$  reading (37,  
176 42); for this reason, clones that had lost gas vesicles were cultured in parallel with a  $Vac^-$  isolate  
177 of NRC-1 ancestor.

178 The growth of acid-evolved J-population clones was compared to that of the NRC-1  
179 ancestor ( $Vac^+$ ) (**Figs. 1 and 2**). Clone J3-1 reached a significant two-fold higher culture density  
180 than did the ancestor, cultured at pH 6.1 or at 6.3 (**Fig. 1B**). Growth advantage was seen for all  
181 four replicate cultures of J3-1 at pH 6.1 and at pH 6.3, whereas the difference from NRC-1  
182 cultures disappeared at pH 7.2 and at pH 7.5. Thus, strain J3-1 exhibits an acid-specific fitness  
183 advantage. The other acid-evolved J-population strains, however, had no significant growth  
184 advantage compared to NRC-1, under the conditions tested (**Fig. 2**).

185 **Acid-adapted clones shared mutations in *nhaC3*, in *bop*, and in *arcR*.** We inspected  
186 the genomes of acid-adapted populations J and K (acid with iron supplement) for mutations in  
187 specific genes that were not found in the populations evolved at pH 7.5. Seven out of eight of the  
188 J and K clones (but no M or S clones) had target site duplications in or upstream of the  $Na^+/H^+$   
189 antiporter, *nhaC3*, observed by *breseq* and suggestive of an IS element (**Table 2**). PCR  
190 amplification and Sanger sequencing of the mutant *nhaC3* alleles confirmed the presence of  
191 insertion sequences ISH2 (strains K1 and K4) and ISH4 (strains J1, K2-1, K3) (**Table 5; Fig.**  
192 **S2**). Additionally, in J4-2, a partial sequence confirms the presence of 1.1 kb ISH11 insertion

193 flanked by a 10 bp direct repeat, while a large, 3000+ bp insertion in K3 returned a partial  
194 sequence of ISH4 (**Fig. S2**). The partial sequence suggests multiple copies of ISH4, or possibly a  
195 composite transposon.

196 Clones J3-1 and K1 each contained a target site duplication in the gene *bop* that encodes  
197 the light-driven proton pump (bacteriorhodopsin) (32). The J3-1 allele was confirmed by Sanger  
198 sequence as a 1.1 kb insertion of ISH1 with an eight bp target site duplication in *bop* (**Table 5**;  
199 **Fig. S2**). This exact mutation has been previously studied in bacteriorhodopsin mutants, and was  
200 in fact the first transposable element identified in haloarchaea (32). This particular target site  
201 duplication was shared with acid-evolved clone K1. At a different position, a *bop* ISH insertion  
202 was found in one of the M population clones (M3-1) which had not undergone acid selection,  
203 consistent with previous spontaneous insertions in this gene.

204 The *bop* and *nhaC3* mutations were found together in J3-1, but also in acid-adapted K1,  
205 which did not show a significant phenotype under our conditions tested. We inspected strain J3-1  
206 for candidate mutations that might be responsible for this strain's unique degree of adaptation at  
207 low pH. Overall, the J3-1 genome had 16 mutations compared to the NRC-1 ancestor (**Table 6**).  
208 Of these, only one mutation affected a gene not affected in any other evolved clone. This is a  
209 missense mutation in a ferredoxin gene (*vng1561*) resulting in a conservative change from lysine  
210 to arginine. Mutations were also found affecting several proteins involved in transcriptional  
211 regulation, which in particular combination might contribute to the acid fitness phenotype.

212 Four acid-evolved genomes (J-3, K-1, K2-1, K4-1) and one non-acid-evolved clone (M3-  
213 1) possess TSDs at different sites in *arcR* on pNRC100 (**Table S3**). ArcR mediates  
214 transcriptional regulation of the *arcABDCR* operon for arginine catabolism (51, 52). In *E. coli*,  
215 the arginine decarboxylase Adi consumes a proton, reversing acidification (53). The *adi* system

216 is induced by acid stress but largely lost after long-term acid evolution (20, 22). This would  
217 imply a model for acid adaptation in haloarchaea that is remarkably similar to that observed in *E.*  
218 *coli*, in which acid-stress adaptations are knocked down by long-term acid exposure (21).

219 **Clones evolved at pH 7.5 show no increase in relative fitness.** All evolved clones from  
220 generation 500 with Vac<sup>-</sup> phenotypes were grown over 200 hours in unbuffered CM<sup>+</sup> medium  
221 without acid or iron amendment and compared to the growth phenotype of the NRC-1 Vac<sup>-</sup>  
222 control strain (**Fig. S2A**). Similarly, the growth phenotypes in unstressed medium of Vac<sup>+</sup> clones  
223 from the 500-generation populations that retained them were compared to that of the NRC-1  
224 Vac<sup>+</sup> ancestor (**Fig. S2B**). None of the M populations show a significant growth advantage  
225 compared to the ancestral strain (**Fig. S3A and B**).

226 Growth curves were also conducted for clones from the S populations (evolved with 600  
227  $\mu\text{M}$  FeSO<sub>4</sub>). Media contained CM<sup>+</sup> pH 7.5 with 100 mM MOPS and 600  $\mu\text{M}$  FeSO<sub>4</sub>. All  
228 evolved clones were persistent Vac<sup>-</sup> mutants at generation 500 and are thus compared to an  
229 NRC-1 Vac<sup>-</sup> control (**Fig. S4**). No significant differences were observed.

230

231

232 DISCUSSION

233 Here we report one of the first evolution experiments on a haloarchaeon; a previous experiment  
234 involved selection of mutants resistant to ionizing radiation (27). We compared four  
235 environmental conditions: low pH versus optimal pH 7.5, with or without iron supplementation.  
236 Overall, in the 500-generation evolved strains, we found a striking pattern of large ISH-mediated  
237 deletions, particularly in the two minichromosomes (**Table S1-S3**). For comparison, in *E. coli*,  
238 experimental evolution for 2,000 generations at low pH yields only occasional large deletions  
239 (20, 21). However, in the haloarchaeon NRC-1 after just 500 generations every evolved clone  
240 contained several large-scale deletions. ISH insertion mutations greatly outnumbered SNPs.  
241 These types of changes reflect frequent DNA rearrangements and genetic variability observed  
242 previously in NRC-1 (32, 38, 44).

243 The acid-adapted NRC-1 populations showed a striking prevalence of mutations affecting  
244 the NhaC3 Na<sup>+</sup>/H<sup>+</sup> antiporter. While NhaC3 is useful for expelling excess Na<sup>+</sup>, its long-term  
245 function at low pH the proton gradient could over-drive the system, perhaps acidifying the  
246 cytoplasm. For comparison, in *E. coli*, experimental evolution with the PMF-depleting uncoupler  
247 carbonyl cyanide m-chlorophenylhydrazone (CCCP) leads to mutation in an *nha* ortholog (54).

248 In addition, the acid-evolved strains J3-1 and K1 show an identical insertion mutation  
249 affecting *bop* bacteriorhodopsin. The loss of *bop* may be neutral or advantageous under low  
250 external pH, where a high proton motive force already exists. The bacteriorhodopsin pump could  
251 be a source of proton leakage at high PMF.

252 Another mutant gene in acid-evolved clones was the *arcR* mediator of arginine  
253 catabolism and arginine-ornithine transport. A comparable arginine catabolism system in *E. coli*  
254 exports protons under acid stress, yet is lost during acid evolution (20, 51). The reason for the

255 evolutionary loss is proposed to be a readjustment to long-term acid exposure, for which the  
256 sustained induction of arginine catabolism becomes counterproductive.

257         The acid-fitness advantage of clone J3-1 could arise from a single mutation unique to J3-  
258 1, such as the missense mutation in a ferredoxin that is unique to J3-1. More likely, however,  
259 acid fitness arises from a cumulative effect of loss of function mutations in a number of other  
260 genes. The J3-1 and K1 acid-evolved clones both possess insertions in *nhaC3*, *bop*, and *arcR*. It  
261 is possible that some other factor we missed makes the difference for J3-1 showing an acid-  
262 fitness phenotype under the conditions tested. Nonetheless, it is interesting that the three genes  
263 showing mutations in multiple acid-evolved strains all encode products involved in proton  
264 export. This finding is remarkably consistent with the multiple reports in *E. coli* that long-term  
265 exposure to pH stress leads to loss of proton exchange and other systems that protect cells from  
266 short-term pH stress (21, 26) (Moore et al. 2019 AEM00966-19).

267         Our findings support previous reports of the importance of ISH elements in haloarchaeal  
268 evolution (46), and the observations in *Sulfolobus* that large deletions and loss of function  
269 mutations are fitness tradeoffs for surviving in stressful environments (55). Large deletions and  
270 IS insertions are also common in experimental evolution of bacteria (20, 21, 26, 54). We also  
271 find evidence for accumulation of ploidy changes for the shorter minichromosome, pNRC100  
272 (47). We show that experimental evolution is an effective approach to identify candidate genes  
273 for environmental stress response in a haloarchaeon.

274

275 MATERIALS AND METHODS

276

277 ***Halobacterium* strains and media.** All evolved clones were derived from a stock of

278 *Halobacterium* sp. NRC-1 from the laboratory of Shiladitya DasSarma (3). Liquid cultures were

279 grown in Complex Medium Plus Trace Metals (CM<sup>+</sup>) based on Ref (2), Protocol 25: 250 g/l

280 NaCl, 20 g/l MgSO<sub>4</sub>•7H<sub>2</sub>O, 2 g/l KCl, 3 g/l Na<sub>3</sub>C<sub>6</sub>H<sub>5</sub>O<sub>7</sub>•2H<sub>2</sub>O, 10 g/l Oxoid Peptone, and 100

281 µl/l Trace Metals (3.5 g/l FeSO<sub>4</sub>•7H<sub>2</sub>O, 0.88 g/l ZnSO<sub>4</sub>•7H<sub>2</sub>O, 0.66 g/l MnSO<sub>4</sub>•H<sub>2</sub>O, and 0.2 g/l

282 CuSO<sub>4</sub>•5H<sub>2</sub>O dissolved 0.1M HCl) with supplements as needed for the conditions examined

283 (56). CM<sup>+</sup> solid medium included addition of 20 g/l granulated agar. All cultures were incubated

284 at 42°C with rotation. Cultures on solid media were incubated at 42°C for 7–10 days until

285 colonies reached approximately 1 mm in diameter. A Vac<sup>-</sup> mutant of our NRC-1 stock culture

286 was obtained by picking a Vac<sup>-</sup> colony followed by three restreaks on CM<sup>+</sup> agar.

287 Liquid CM<sup>+</sup> media for experimental evolution was made with either 100mM PIPES

288 (pKa=6.8) or 100mM MOPS (pKa=7.2) buffer with pH adjusted using 5 M NaOH or 5 M HCl as

289 needed, followed by filter sterilization. 100 mM FeSO<sub>4</sub> stock was prepared in deionized water

290 and filter-sterilized before every other dilution during serial batch culture evolution. Sterilized

291 FeSO<sub>4</sub> stock was added to buffered CM<sup>+</sup> after filter sterilization. For freezer stocks, live cultures

292 were mixed 1:1 with a 50% glycerol, 50% complex medium basal salts mixture as a

293 cryoprotectant. Complex medium basal salts were 250 g/l NaCl, 20 g/l MgSO<sub>4</sub>•7H<sub>2</sub>O, 2 g/l KCl,

294 3 g/l Na<sub>3</sub>C<sub>6</sub>H<sub>5</sub>O<sub>7</sub>•2H<sub>2</sub>O. Acidic, control, iron-rich and acidic, and iron-rich media used in the

295 evolution consisted of: CM<sup>+</sup> pH 6.5 with 100 mM PIPES (populations J1-J4), CM<sup>+</sup> pH 7.5 with

296 100 mM MOPS (populations M1-M4), CM<sup>+</sup> pH 6.5 (or pH 6.3) with 100 mM PIPES 600 µM

297 FeSO<sub>4</sub> (populations K1-K4), and CM<sup>+</sup> pH 7.5 with 100 mM MOPS 600 µM FeSO<sub>4</sub> (populations

298 S1-S4).

299           **Experimental evolution.** A total of 16 populations (four per evolution condition) were  
300 founded from a 5 ml CM<sup>+</sup> tube culture (7-10 days incubation) of *Halobacterium sp.* NRC-1 that  
301 was diluted 500-fold and incubated 4 days in a 42°C shaker bath at 200 rpm. At the end of the  
302 fourth day, 10 µl of the previous culture was diluted into 5 ml of fresh CM<sup>+</sup> media amended as  
303 necessary for the respective stress condition. The resulting 1:500 dilutions yield approximately  
304 nine generations per dilution cycle. If cultures did not reach a healthy cell density as qualitatively  
305 evaluated for each dilution, 1:100 or 1:250 dilutions were performed to prevent loss of evolving  
306 populations. Alternative dilution concentrations were factored into total generation counts at the  
307 end of experimental evolution. When evolution was interrupted, the populations were revived by  
308 1:250 dilutions from freezer stocks of the previous dilution. Freezer stocks comprised 1 ml  
309 liquid, mature haloarchaea culture for each evolving population and 0.5 ml glycerol/basal salts  
310 mixture, stored in 2 ml Wheaton brand vials and frozen at -80°C for each dilution, totaling 16  
311 freezer stocks every four days. A summary of the evolution procedure is presented in **Figure S1**.

312           **Clone selection.** Clones were isolated by plating 10 µl of culture from generation 100,  
313 200, 300, 400, and 500 from freezer stocks for all 16 evolving populations on CM<sup>+</sup> agar plates,  
314 followed by incubation in a sealed container at 42°C for 7–10 days. Isolated colonies were then  
315 selected for diverse Vac phenotypes, streaked on fresh CM<sup>+</sup> agar plates, and incubated a second  
316 time. The process was repeated a third time to ensure isolation of select genetically pure clones.  
317 Colonies from the third streak were grown in unbuffered CM<sup>+</sup> pH 7.2, and stocks were frozen for  
318 later phenotype and genotype characterization. One clone was isolated from each population  
319 every 100 generations. For populations that presented mixed gas vesicle production phenotypes,  
320 we isolated both a Vac<sup>+</sup> clone and a Vac<sup>-</sup> clone. In total, 75 clones were isolated from generation  
321 100, 200, 300, and 400 of the evolution. Clones were similarly isolated from generation 500, but



322 the first streak was taken directly from evolving populations, rather than frozen Wheaton vials.  
323 Two clones were isolated from each population at 500 generations, for a total of 32 clones.

324 **Gas vesicle formation phenotype analysis.** Vesicle formation phenotype was assessed  
325 qualitatively based on the relative translucence of plated colonies and denoted as Vac<sup>+</sup> or Vac<sup>-</sup> as  
326 appropriate (2, 42). If more than one Vac phenotype was observed in a streak during strain  
327 isolation, the phenotypic variant colonies were re-streaked and treated as separate clonal isolates.  
328 Vac phenotypes were evaluated for persistence with each streak based on whether or not Vac<sup>+</sup>  
329 colonies yielded >1% Vac<sup>-</sup> progeny or vice versa.

330 **Growth assays.** The generation 500 clones used in these assays are summarized in **Table**

331 **1.** Clones were cultured in unbuffered CM<sup>+</sup> at pH 7.2, and incubated for four days in a 42°C  
332 shaker bath with 200 rpm orbital aeration. Overweek starter cultures were diluted 1:1000 into  
333 new test tubes with 5 ml of the appropriate test condition media. A media blank was included for  
334 each media condition, and each clone was tested with four to eight biological replicates,  
335 depending on the assay. Immediately after inoculation, OD<sub>600</sub> values were recorded by a  
336 Spectramax 384+ spectrophotometer at 600 nm using Softmax Pro version 6.4.2. Daily readings  
337 were taken for nine days. Media for these tests included CM<sup>+</sup> pH 6.3 100 mM PIPES and CM<sup>+</sup>  
338 pH 6.1 100 mM PIPES for J clones. M clones were tested in CM<sup>+</sup> pH 7.5 100 mM MOPS. K  
339 clones were tested in CM<sup>+</sup> pH 6.3 100 mM PIPES 600 μM FeSO<sub>4</sub> and CM<sup>+</sup> pH 6.1 100 mM  
340 PIPES 600 μM FeSO<sub>4</sub>. S clones were tested in CM<sup>+</sup> pH 7.5 100 mM MOPS 600 μM FeSO<sub>4</sub>.

341 To test for pH-dependent growth advantages, evolved clones that showed growth  
342 advantages over ancestor in their respective evolution stress conditions under which they were  
343 evolved were also tested for growth advantages in pH conditions other than those in which they  
344 evolved. For these experiments, J3-1 was cultured in CM<sup>+</sup> pH 7.5 100 mM MOPS and compared

345 using a Vac<sup>+</sup> NRC-1 control, M3-1 was cultured in CM+ pH 6.1 100 mM PIPES and compared  
346 using a Vac<sup>+</sup> NRC-1 control, and K2-1 was cultured in CM+ pH 7.5 100 mM MOPS 600 μM  
347 FeSO<sub>4</sub> and compared to both Vac<sup>+</sup> and Vac<sup>-</sup> NRC-1 controls due to gas vesicle phenotype  
348 ambiguity. Analysis was carried out with comparisons to an ancestral control expressing the  
349 same Vac phenotype as the evolved clone.

350 All growth assays were evaluated for statistical significance using ANOVA test with  
351 Tukey post-hoc or paired T-test using base R and agricolae package. Comparisons between  
352 clones were made using post log-phase endpoint “E” values for optical density at six days post  
353 inoculation.

354 **DNA extraction and genome sequencing.** Genomic DNA was isolated from the 16  
355 evolved clones and the ancestor NRC-1 using an Epicentre MasterPure Gram Positive DNA  
356 Extraction Kit and a modified procedure. Lysozyme was omitted, and DNA purity and  
357 concentration was determined using a Thermo Scientific NanoDrop 2000. Genomic DNA was  
358 sequenced at the Michigan State University Research Technology Support Facility (RTSF)  
359 Genomics Core. Libraries were prepared using the Illumina TruSeq Nano DNA library  
360 preparation kit for Illumina MiSeq sequencing and loaded on a MiSeq flow cell after library  
361 validation and quantitation. Sequencing was completed using a 2- by 250-bp paired-end format  
362 using Illumina 500 cycle V2 reagent cartridge. Illumina Real Time Analysis (RTA) v1.18.54  
363 performed base calling, and the output of the RTA was demultiplexed and converted to FastQ  
364 format with Illumina Bcl2fastq v1.8.4.

365 **Sequence assembly and analysis using the *breseq* computational pipeline.** The  
366 computational pipeline *breseq* version 0.27.1 was used to assemble and annotate the resulting  
367 Illumina reads of the evolved clones (39–41). The current *breseq* version is optimized to detect

368 IS element insertions and IS-mediated deletions, as well as SNPs and other mutations in *E. coli*  
369 (19). Illumina reads were mapped to the *Halobacterium sp.* NRC-1 reference genome (NCBI  
370 GenBank assembly accession GCA\_000006805.1). Mutations were predicted by *breseq* through  
371 sequence comparisons between the evolved and ancestral clones.

372 The Integrative Genomics Viewer (IGV) from the Broad Institute at Massachusetts  
373 Institute of Technology was used to visualize the assembly and mutations in the evolved clonal  
374 sequences mapped to the reference NRC-1 genome (57). Each replicon was mapped separately  
375 using the following RefSeq IDs: NC\_002607.1 (main chromosome), NC\_001869.1 (pNRC100),  
376 and NC\_002608.1 (pNRC200). Sequence mean coverage in each evolved clone was estimated  
377 using the *breseq* fit dispersion function.

378 **PCR confirmation of ISH insertions.** PCR primers (Table 5) were designed to confirm  
379 the presence of insertion sequences at hypothetical target site duplications. Primers adhered to  
380 the following specifications using Sigma Aldrich Oligo Evaluator: 19-22 bp in length, GC  
381 content between 40-60%, no single bp runs >3, weak to no secondary structure, and no primer  
382 dimer. Oligos were checked for sequence identity of  $\leq 13$  bp to any part of the NRC-1 genome  
383 other than the target site using NCBI BLAST. We ran 50- $\mu$ l PCR using Applied Biosystems  
384 Amplitaq Gold 360 Master Mix according to the package insert with 50  $\mu$ l reaction containing  
385 GC enhancer. To assess insert length, 10  $\mu$ l of PCR product was electrophoresed in a 1% agarose  
386 gel. PCR products were then purified either by Qiagen QIAquick PCR Purification Kit or  
387 QIAquick Gel Extraction Kit.

388 **Accession number for sequenced genomes.** Sequenced genomes are deposited under  
389 SRA accession number SRP195828.

390

391 ACKNOWLEDGEMENTS

392           This project was supported by the National Science Foundation award MCB-1613278 to  
393 Joan Slonczewski; by the 2016 NASA Astrobiology Program Early Career Collaboration Award  
394 to Karina Kunka and Jessie Griffith; and by NASA Exobiology grants NNX15AM07G and  
395 NNH18ZDA001N to Shiladitya DasSarma.

396

397

398 TABLES AND FIGURES

399

400 **Table 1. Strains used in this study**

| Strain Name | Description     | Generation | Evolution Condition                                    | Vac +/- * | Source      |
|-------------|-----------------|------------|--------------------------------------------------------|-----------|-------------|
| NRC-1       | Ancestor strain | 0          | --                                                     | +         | S. DasSarma |
| NRC-1       | Ancestor strain | 0          | --                                                     | -         | S. DasSarma |
| JLSHA075    | Clone J1        | 500        | pH 6.3<br>100 mM PIPES                                 | -         | This study  |
| JLSHA078    | Clone J2-2      | 500        |                                                        | -         | This study  |
| JLSHA079    | Clone J3-1      | 500        |                                                        | +         | This study  |
| JLSHA082    | Clone J4-2      | 500        |                                                        | -         | This study  |
| JLSHA083    | Clone M1        | 500        | pH 7.5<br>100 mM MOPS                                  | -         | This study  |
| JLSHA086    | Clone M2-2      | 500        |                                                        | -         | This study  |
| JLSHA087    | Clone M3-1      | 500        |                                                        | +         | This study  |
| JLSHA089    | Clone M4-1      | 500        |                                                        | +         | This study  |
| JLSHA091    | Clone K1        | 500        | pH 6.3<br>100 mM PIPES<br>600 $\mu$ M Fe <sup>2+</sup> | -         | This study  |
| JLSHA093    | Clone K2-1      | 500        |                                                        | +         | This study  |
| JLSHA095    | Clone K3        | 500        |                                                        | -         | This study  |
| JLSHA097    | Clone K4        | 500        |                                                        | -         | This study  |
| JLSHA099    | Clone S1        | 500        | pH 7.5<br>100 mM MOPS<br>600 $\mu$ M Fe <sup>2+</sup>  | -         | This study  |
| JLSHA101    | Clone S2        | 500        |                                                        | -         | This study  |
| JLSHA103    | Clone S3        | 500        |                                                        | -         | This study  |
| JLSHA105    | Clone S4        | 500        |                                                        | -         | This study  |

401 \*"+" indicates gas vesicle-forming, "--" indicates non gas vesicle-forming

Table 2. Selected mutations found in evolved clones.\*†

| Replicon   | Start bp   | Mutation     | J1 | J2-2 | J3-1 | J4-2 | M1 | M2-2 | M3-1 | M4-1 | K1 | K2-1 | K3 | K4 | S1 | S2 | S3 | S4 | Annotation                             | Gene Description                                                                                                                                                                                                                                                                                                                                                                                                                          |
|------------|------------|--------------|----|------|------|------|----|------|------|------|----|------|----|----|----|----|----|----|----------------------------------------|-------------------------------------------------------------------------------------------------------------------------------------------------------------------------------------------------------------------------------------------------------------------------------------------------------------------------------------------------------------------------------------------------------------------------------------------|
| Chromosome | ~15,266    | TSD          |    |      |      |      |    |      |      |      |    |      |    |    |    |    |    |    | TSD: intergenic                        | Starts after <i>vng18</i> and ends before <i>vng19</i> .                                                                                                                                                                                                                                                                                                                                                                                  |
| Chromosome | ~23,074    | TSD          |    |      |      |      |    |      |      |      |    |      |    |    |    |    |    |    | TSD: intergenic                        | Starts after <i>vng27</i> and ends before <i>vng28</i> .                                                                                                                                                                                                                                                                                                                                                                                  |
| Chromosome | ~25,216    | TSD          |    |      |      |      |    |      |      |      |    |      |    |    |    |    |    |    | TSD: intergenic                        | Starts after <i>vng29</i> and ends before <i>vng30</i> .                                                                                                                                                                                                                                                                                                                                                                                  |
| Chromosome | ~29,154    | TSD          |    |      |      |      |    |      |      |      |    |      |    |    |    |    |    |    | TSD: coding                            | In <i>vng32</i> .                                                                                                                                                                                                                                                                                                                                                                                                                         |
| Chromosome | ~48,587    | Δ~500 bp     |    |      |      |      |    |      |      |      |    |      |    |    |    |    |    |    | ISH8-3 mediated                        | Starts before <i>vng52</i> and ends in <i>vng53</i> .                                                                                                                                                                                                                                                                                                                                                                                     |
| Chromosome | ~52,664    | TSD          |    |      |      |      |    |      |      |      |    |      |    |    |    |    |    |    | TSD: intergenic                        | Starts after <i>vng56</i> and ends before <i>vng57</i> .                                                                                                                                                                                                                                                                                                                                                                                  |
| Chromosome | ~181,512   | TSD          |    |      |      |      |    |      |      |      |    |      |    |    |    |    |    |    | TSD: coding                            | In <i>dph</i> (Putative DNA primase/helicase - phage associated).                                                                                                                                                                                                                                                                                                                                                                         |
| Chromosome | 414,229    | C→A          |    |      |      |      |    |      |      |      |    |      |    |    |    |    |    |    | A675A (GCG→GCT)                        | In <i>vng537</i> (TRAP transporter permease).                                                                                                                                                                                                                                                                                                                                                                                             |
| Chromosome | ~749,543   | TSD          |    |      |      |      |    |      |      |      |    |      |    |    |    |    |    |    | TSD: coding                            | In <i>vng985</i> .                                                                                                                                                                                                                                                                                                                                                                                                                        |
| Chromosome | ~753,552   | TSD and Δ1bp |    |      |      |      |    |      |      |      |    |      |    |    |    |    |    |    | TSD: intergenic and (T) <sub>9→8</sub> | Starts after <i>vng987</i> and ends before <i>vng988</i> (hypothetical protein/DUF2085 domain-containing protein).                                                                                                                                                                                                                                                                                                                        |
| Chromosome | ~754,476   | TSD          |    |      |      |      |    |      |      |      |    |      |    |    |    |    |    |    | TSD: coding                            | In <i>xcd</i> (integrase).                                                                                                                                                                                                                                                                                                                                                                                                                |
| Chromosome | ~772,459   | TSD          |    |      |      |      |    |      |      |      |    |      |    |    |    |    |    |    | TSD: intergenic                        | Starts before <i>vng1007</i> and ends before <i>flaA1a</i> (flagellin A1 precursor).                                                                                                                                                                                                                                                                                                                                                      |
| Chromosome | ~1,089,129 | TSD          |    |      |      |      |    |      |      |      |    |      |    |    |    |    |    |    | TSD: coding                            | In <b><i>bop</i></b> ( <b>rhodopsin</b> ).                                                                                                                                                                                                                                                                                                                                                                                                |
| Chromosome | ~1,229,749 | TSD/Δ        |    |      |      |      |    |      |      |      |    |      |    |    |    |    |    |    | TSD: coding/ ISH2 deletion             | In <i>vng1650</i> .                                                                                                                                                                                                                                                                                                                                                                                                                       |
| PNRC100    | 0          | Δ~7500 bp    |    |      |      |      |    |      |      |      |    |      |    |    |    |    |    |    | ISH7-1 deleted                         | Starts before <i>vng5001</i> , <i>vng5003</i> , <i>vng5005</i> , <i>vng5007</i> , <i>vng5008</i> , <i>vng5009</i> , <i>sojA</i> ( <i>spo0A</i> activation inhibitor), ends in <i>vng5011</i> .                                                                                                                                                                                                                                            |
| PNRC100    | ~9,546     | Δ~2000 bp    |    |      |      |      |    |      |      |      |    |      |    |    |    |    |    |    | ISH3-1                                 | Starts in <i>repH</i> (replication protein), ends after <i>repH</i> .                                                                                                                                                                                                                                                                                                                                                                     |
| PNRC100    | ~14,052    | Δ~147 bp     |    |      |      |      |    |      |      |      |    |      |    |    |    |    |    |    | ISH3-1                                 | Starts after <i>vng5015</i> and ends before <i>vng5016</i> .                                                                                                                                                                                                                                                                                                                                                                              |
| PNRC100    | ~15,600    | Δ16500 bp    |    |      |      |      |    |      |      |      |    |      |    |    |    |    |    |    | ISH8-3, 8-1                            | Starts before <i>vng5016</i> , <i>vng5017</i> , <i>gvpM-L1-K1-J1-I1-H1-G1-F1-E1-D1-A1-C1-N1-O1</i> (GvpM protein cluster A), <i>sojB</i> ( <i>Spo0A</i> activation inhibitor), <i>htlD</i> (Htr-like protein), <i>vng5038</i> , <i>tbpA</i> (transcription initiation factor IID), ends after <i>vng5040</i> .                                                                                                                            |
| PNRC100    | ~41,820    | Δ~17000bp    |    |      |      |      |    |      |      |      |    |      |    |    |    |    |    |    | ISH5-1*, 8-5                           | Starts before <i>cydAB</i> (cytochrome d oxidase), <i>vng5059</i> , <i>vng5061</i> , <i>vng5062</i> , <i>vng5063</i> , <i>vng5064</i> , <i>phoT1</i> (Na dep. phosphate transporter), <i>boa3</i> (bacterio-opsin activator), <i>vng5069</i> , <i>yfmO3</i> (MDR, <i>vng5073</i> , <i>vng5074</i> , <i>vng5075</i> , <i>trxA-trxB1-trh</i> (thioredoxin reductase related), <i>vng5079</i> , <i>vng5080</i> , ends after <i>vng5081</i> . |
| PNRC100    | ~71,208    | Δ~3447 bp    |    |      |      |      |    |      |      |      |    |      |    |    |    |    |    |    | ISH2                                   | Starts before <i>vng5097</i> , <i>yobE</i> (general secretion pathway), ends in <i>vng5100</i> .                                                                                                                                                                                                                                                                                                                                          |
| PNRC100    | ~75,169    | Δ~4534 bp    |    |      |      |      |    |      |      |      |    |      |    |    |    |    |    |    | ISH2                                   | Starts in <i>vng5102</i> , <i>vng5104</i> , <i>vng5105</i> , <i>vng5106</i> , ends after <i>vng5108</i> (putative winged helix DBD - Bonneau et al 2004).                                                                                                                                                                                                                                                                                 |
| PNRC100    | ~81,100    | Δ~750 bp     |    |      |      |      |    |      |      |      |    |      |    |    |    |    |    |    | ISH8-3, 3-1                            | Starts before and ends after <i>vng5112</i> .                                                                                                                                                                                                                                                                                                                                                                                             |
| PNRC100    | ~83,375    | Δ~3790 bp    |    |      |      |      |    |      |      |      |    |      |    |    |    |    |    |    | ISH3-1, 7-2                            | Starts before <i>vng5115</i> , <i>vng5116</i> , <i>vng5118</i> , <i>vng5119</i> , <i>vng5120</i> , and ends in <i>vng5122</i> .                                                                                                                                                                                                                                                                                                           |
| PNRC100    | ~87,224    | SNP          |    |      |      |      |    |      |      |      |    |      |    |    |    |    |    |    | SNP                                    | In <i>vng5122</i> .                                                                                                                                                                                                                                                                                                                                                                                                                       |
| PNRC100    | ~133,744   | Δ~8776 bp    |    |      |      |      |    |      |      |      |    |      |    |    |    |    |    |    | ISH8-2, 3-3                            | Starts before <i>vng5173</i> , <i>vng5174</i> , <i>vng5175</i> , <i>mth</i> (putative methyltransferase), <i>arsR2</i> (transcriptional regulator), <i>vng5178</i> , <i>arsA2</i> (arsenic pump-driving ATPase), <i>arsD</i> (arsenic resistance repressor), <i>arsR</i> (transcriptional regulator), <i>arsC</i> (transcriptional regulator), and ends after <i>vng5185</i> .                                                            |
| PNRC100    | ~143,907   | Δ~6349 bp    |    |      |      |      |    |      |      |      |    |      |    |    |    |    |    |    | ISH3-3, 2                              | Starts before <i>vng 5186</i> , <i>vng5189</i> , <i>vng5191</i> , <i>vng5192</i> , <i>rfa1</i> (single-stranded DNA-binding replication protein A), <i>vng5195</i> , and ends in <i>vng5197</i> .                                                                                                                                                                                                                                         |
| PNRC100    | ~150,769   | Δ~109 bp     |    |      |      |      |    |      |      |      |    |      |    |    |    |    |    |    | ISH2, 3-2                              | Starts after <i>vng5198</i> and ends before <i>vng5199</i> .                                                                                                                                                                                                                                                                                                                                                                              |
| PNRC100    | ~152,257   | Δ~13 bp      |    |      |      |      |    |      |      |      |    |      |    |    |    |    |    |    | ISH2, 3-2                              | Starts and ends in <i>vng5199</i> .                                                                                                                                                                                                                                                                                                                                                                                                       |
| PNRC100    | ~153,526   | Δ~15 bp      |    |      |      |      |    |      |      |      |    |      |    |    |    |    |    |    | ISH3-2, 2                              | Starts after <i>vng5200</i> and ends before <i>vng5201</i> .                                                                                                                                                                                                                                                                                                                                                                              |
| PNRC100    | ~164,889   | Δ16,681 bp   |    |      |      |      |    |      |      |      |    |      |    |    |    |    |    |    | ISH8-5, 5-1                            | Starts before <i>vng5216</i> , <i>vng5217</i> , <i>vng5218</i> , <i>trxA-trxB1-trh</i> (thioredoxin reductase related), <i>vng522</i> , <i>vng5223</i> , <i>vng5224</i> , <i>yfmO3</i> (MDR protein), <i>vng5228</i> , <i>boa3</i> (bacterio-opsin activator), <i>phoT1</i> (Na dep. phosphate transporter), <i>vng5233</i> , <i>vng5234</i> , <i>vng5235</i> , <i>vng5236</i> , <i>vng5238</i> , <i>cydBA</i> (cytochrome d oxidase).    |



Table 3. Classes of mutations found in evolved clones.\*

| Chromosome       |        |      |      |      |         |      |      |      |                      |      |    |    |           |    |    |    |              |
|------------------|--------|------|------|------|---------|------|------|------|----------------------|------|----|----|-----------|----|----|----|--------------|
| Mutation Type    | Low pH |      |      |      | Control |      |      |      | Low pH and iron-rich |      |    |    | Iron-rich |    |    |    | Mutation Sum |
|                  | J1     | J2-1 | J3-1 | J4-2 | M1      | M2-2 | M3-1 | M4-1 | K1                   | K2-1 | K3 | K4 | S1        | S2 | S3 | S4 |              |
| TSD              | 4      | 5    | 3    | 5    | 1       | 4    | 4    | 1    | 7                    | 6    | 5  | 5  | 1         | 6  | 6  | 1  | 64           |
| Deletion         | 1      | 1    | 0    | 1    | 1       | 1    | 2    | 2    | 1                    | 1    | 0  | 1  | 0         | 0  | 1  | 0  | 13           |
| SNP              | 0      | 0    | 1    | 0    | 1       | 2    | 1    | 1    | 1                    | 1    | 0  | 1  | 0         | 0  | 0  | 1  | 10           |
| Insertion        | 0      | 0    | 0    | 0    | 0       | 0    | 0    | 0    | 0                    | 0    | 0  | 0  | 0         | 0  | 0  | 0  | 0            |
| Chromosome Total | 5      | 6    | 4    | 6    | 3       | 7    | 7    | 4    | 9                    | 8    | 5  | 7  | 1         | 6  | 7  | 2  | 87           |

  

| PNRC100       |     |      |      |      |    |      |      |      |    |      |    |    |    |    |    |    |              |
|---------------|-----|------|------|------|----|------|------|------|----|------|----|----|----|----|----|----|--------------|
| Mutation Type | J1  | J2-1 | J3-1 | J4-2 | M1 | M2-2 | M3-1 | M4-1 | K1 | K2-1 | K3 | K4 | S1 | S2 | S3 | S4 | Mutation Sum |
|               | TSD | 0    | 1    | 0    | 0  | 0    | 7    | 0    | 0  | 3    | 0  | 0  | 0  | 2  | 2  | 0  |              |
| Deletion      | 5   | 3    | 4    | 7    | 2  | 0    | 6    | 3    | 17 | 8    | 8  | 10 | 4  | 3  | 5  | 4  | 89           |
| SNP           | 2   | 0    | 0    | 0    | 0  | 6    | 0    | 0    | 0  | 0    | 3  | 5  | 0  | 0  | 0  | 0  | 16           |
| Insertion     | 0   | 0    | 0    | 0    | 0  | 0    | 0    | 0    | 0  | 0    | 0  | 0  | 0  | 0  | 0  | 0  | 0            |
| PNRC100 Total | 7   | 4    | 4    | 7    | 2  | 13   | 6    | 3    | 20 | 8    | 11 | 15 | 6  | 5  | 5  | 4  | 120          |

  

| PNRC200       |     |      |      |      |    |      |      |      |    |      |    |    |    |    |    |    |              |
|---------------|-----|------|------|------|----|------|------|------|----|------|----|----|----|----|----|----|--------------|
| Mutation Type | J1  | J2-1 | J3-1 | J4-2 | M1 | M2-2 | M3-1 | M4-1 | K1 | K2-1 | K3 | K4 | S1 | S2 | S3 | S4 | Mutation Sum |
|               | TSD | 1    | 1    | 2    | 1  | 1    | 4    | 0    | 0  | 3    | 7  | 3  | 7  | 2  | 0  | 3  |              |
| Deletion      | 6   | 4    | 6    | 7    | 8  | 14   | 15   | 7    | 15 | 5    | 4  | 5  | 3  | 5  | 6  | 5  | 115          |
| SNP           | 1   | 0    | 0    | 0    | 0  | 5    | 0    | 0    | 1  | 0    | 3  | 5  | 0  | 0  | 0  | 0  | 15           |
| Insertion     | 1   | 0    | 0    | 0    | 0  | 0    | 0    | 0    | 0  | 0    | 0  | 0  | 0  | 0  | 0  | 0  | 1            |
| PNRC200 Total | 9   | 5    | 8    | 8    | 9  | 23   | 15   | 7    | 19 | 12   | 10 | 17 | 5  | 5  | 9  | 10 | 171          |

  

| Complete genome |     |      |      |      |    |      |      |      |    |      |    |    |    |    |    |    |              |
|-----------------|-----|------|------|------|----|------|------|------|----|------|----|----|----|----|----|----|--------------|
| Mutation Type   | J1  | J2-1 | J3-1 | J4-2 | M1 | M2-2 | M3-1 | M4-1 | K1 | K2-1 | K3 | K4 | S1 | S2 | S3 | S4 | Mutation Sum |
|                 | TSD | 5    | 7    | 5    | 6  | 2    | 15   | 4    | 1  | 13   | 13 | 8  | 12 | 5  | 8  | 9  |              |
| Deletion        | 12  | 8    | 10   | 15   | 11 | 15   | 23   | 12   | 33 | 14   | 12 | 16 | 7  | 8  | 12 | 9  | 217          |
| SNP             | 3   | 0    | 1    | 0    | 1  | 13   | 1    | 1    | 2  | 1    | 6  | 11 | 0  | 0  | 0  | 1  | 41           |
| Insertion       | 1   | 0    | 0    | 0    | 0  | 0    | 0    | 0    | 0  | 0    | 0  | 0  | 0  | 0  | 0  | 0  | 1            |
| Complete Total  | 21  | 15   | 16   | 21   | 14 | 43   | 28   | 14   | 48 | 28   | 26 | 39 | 12 | 16 | 21 | 16 | 378          |

\*TSD = target site duplication; SNP = single nucleotide polymorphism.



Table 4. Coverage depth for NRC-1 and evolved clones.

| Strain       | Main chromosome |    | pNRC100     |    | pNRC200     |    |
|--------------|-----------------|----|-------------|----|-------------|----|
|              | Read depth*     | SD | Read depth* | SD | Read depth* | SD |
| <b>NRC-1</b> | 50              | 10 | 128         | 15 | 64          | 10 |
| <b>J1</b>    | 46              | 9  | 338         | 29 | 53          | 9  |
| <b>J2-2</b>  | 41              | 9  | 156         | 14 | 48          | 8  |
| <b>J3-1</b>  | 57              | 11 | 87          | 13 | 91          | 14 |
| <b>J4-2</b>  | 64              | 11 | 137         | 15 | 85          | 13 |
| <b>M1</b>    | 49              | 9  | 187         | 18 | 44          | 7  |
| <b>M2-2</b>  | 67              | 11 | 165         | 17 | 62          | 10 |
| <b>M3-1</b>  | 49              | 10 | 275         | 26 | 54          | 9  |
| <b>M4-1</b>  | 65              | 11 | 162         | 13 | 75          | 11 |
| <b>K1</b>    | 74              | 13 | 72          | 10 | 63          | 11 |
| <b>K2-1</b>  | 72              | 13 | NA          | NA | 76          | 11 |
| <b>K3</b>    | 52              | 10 | 363         | 29 | 92          | 13 |
| <b>K4</b>    | 59              | 11 | 96          | 11 | 71          | 15 |
| <b>S1</b>    | 39              | 8  | 125         | 15 | 44          | 8  |
| <b>S2</b>    | 42              | 9  | 169         | 18 | 34          | 7  |
| <b>S3</b>    | 47              | 10 | 202         | 16 | 55          | 9  |
| <b>S4</b>    | 46              | 9  | 185         | 14 | 37          | 7  |

\*Mean copy number of sequence across the replicon, according to the *breseq* fitted dispersion model. SD = standard deviation predicted by the model.

**Table 5. ISH insertions confirmed by PCR in acid-adapted strains.**

| <b>Strain</b> | <b>Gene Mutation</b>   | <b>ISH</b> | <b>Primer 1</b>      | <b>Primer 2</b>      |
|---------------|------------------------|------------|----------------------|----------------------|
| J1            | <i>nhaC3</i> insertion | ISH4       | GATAACGATGGACATGTACT | GTCGGTATCGTTCTTTTGGG |
| J3-1          | <i>bop</i> insertion   | ISH1       | GAGTTACACACATATCCTCG | GCGTAGAATTTCTTTGCATC |
| J4-2          | <i>nhaC3</i> insertion | ISH11      | GATAACGATGGACATGTACT | GTCGGTATCGTTCTTTTGGG |
| K1            | <i>nhaC3</i> insertion | ISH2       | GATAACGATGGACATGTACT | GTCGGTATCGTTCTTTTGGG |
| K2-1          | <i>nhaC3</i> insertion | ISH4       | GATAACGATGGACATGTACT | GTCGGTATCGTTCTTTTGGG |
| K3            | <i>nhaC3</i> insertion | ISH4       | GATAACGATGGACATGTACT | GTCGGTATCGTTCTTTTGGG |
| K4            | <i>nhaC3</i> insertion | ISH2       | GATAACGATGGACATGTACT | GTCGGTATCGTTCTTTTGGG |

Table 6. Acid-evolved clone J3-1 mutations.\* †

| Replicon   | Start bp  | End bp    | Mutation    | Annotation                             | Gene                                      | Description                                                                                                                                                                                                                                                                                                                                                                                                                                                                                 |
|------------|-----------|-----------|-------------|----------------------------------------|-------------------------------------------|---------------------------------------------------------------------------------------------------------------------------------------------------------------------------------------------------------------------------------------------------------------------------------------------------------------------------------------------------------------------------------------------------------------------------------------------------------------------------------------------|
| Chromosome | 749,943   | 749,954   | (11 bp) 1→2 | TSD: coding (562/2007 nt)              | [ <i>vng985</i> →]                        | In <i>vng985</i> .                                                                                                                                                                                                                                                                                                                                                                                                                                                                          |
| Chromosome | 1,089,129 | 1,089,137 | (8 bp) 1→2  | TSD: coding (15/789 nt)                | [ <i>bop</i> →]                           | In <i>bop</i> (rhodopsin).                                                                                                                                                                                                                                                                                                                                                                                                                                                                  |
| Chromosome | 1,163,363 |           | A→G         | <b>K197R (AAA→AGA)</b>                 | [ <i>vng1561</i> →]                       | In <i>vng1561</i> (ferredoxin).                                                                                                                                                                                                                                                                                                                                                                                                                                                             |
| Chromosome | 1,229,749 | 1,229,760 | (11 bp) 1→2 | TSD: coding (582/849 nt)               | [ <i>vng1650</i> ←]                       | In <i>vng1650</i> .                                                                                                                                                                                                                                                                                                                                                                                                                                                                         |
| PNRC100    | 0         | 7,788     | Δ7788 bp    | ISH7-1 deleted                         | ( <i>vng5001</i> ←) - [← <i>vng5011</i> ] | Starts before <i>vng5001</i> , includes <i>vng5003</i> , <i>vng5005</i> , <i>vng5007</i> , <i>vng5008</i> , <i>vng5009</i> , <i>sojA</i> ( <i>spo0A</i> activation inhibitor), ends in <i>vng5011</i> .                                                                                                                                                                                                                                                                                     |
| PNRC100    | 71,210    | 74,656    | Δ3447 bp    | ISH2 mediated                          | ( <i>vng5097</i> →) - [← <i>vng5100</i> ] | Starts before <i>vng5097</i> , includes <i>yobE</i> (general secretion pathway protein homolog), ends in <i>vng5100</i> .                                                                                                                                                                                                                                                                                                                                                                   |
| PNRC100    | 133,743   | 142,521   | Δ8779 bp    | ISH8-2, 3-3 mediated                   | ( <i>vng5173</i> ←) - (→ <i>vng5185</i> ) | Starts before <i>vng5173</i> , includes <i>vng5174</i> , <i>vng5175</i> , <i>mth</i> (putative methyltransferase), <i>arsR2</i> (transcriptional regulator), <i>vng5178</i> , <i>arsA2</i> (arsenical pump-driving ATPase), <i>arsD</i> (arsenic resistance repressor), <i>arsR</i> (transcriptional regulator), <i>arsC</i> (transcriptional regulator), and ends after <i>vng5185</i> .                                                                                                   |
| PNRC100    | 143,909   | 150,253   | Δ6345 bp    | ISH3-3, 2 mediated                     | ( <i>vng5186</i> →) - [→ <i>vng5197</i> ] | Starts before <i>vng5186</i> , includes <i>vng5189</i> , <i>vng5191</i> , <i>vng5192</i> , <i>rfa1</i> (single-stranded DNA-binding replication protein A), <i>vng5195</i> , and ends in <i>vng5197</i> .                                                                                                                                                                                                                                                                                   |
| PNRC200    | 0         | 7,760     | Δ7760 bp    | ISH 7-1 deleted                        | <i>vng6001</i> ← - [← <i>vng6011</i> ]    | Starts before <i>vng6001</i> , includes <i>vng6003</i> , <i>vng6005</i> , <i>vng6007</i> , <i>vng6008</i> , <i>vng6009</i> , <i>sojA</i> ( <i>spo0A</i> activation inhibitor), ends in <i>vng6011</i> .                                                                                                                                                                                                                                                                                     |
| PNRC200    | 71,219    | 74,595    | Δ3377 bp    | ISH 2 mediated                         | ( <i>vng6094</i> →) - [← <i>vng6097</i> ] | Starts before <i>vng6094</i> , includes <i>yobE</i> (general secretion pathway homolog), ends in <i>vng6097</i> .                                                                                                                                                                                                                                                                                                                                                                           |
| PNRC200    | 244,422   | 244,430   | 9 bp (1→2)  | TSD: intergenic                        | ( <i>nhaC3</i> ←) / ( <i>arcB</i> ←)      | Starts after <i>nhaC3</i> (Na <sup>+</sup> /H <sup>+</sup> antiporter) and ends before <i>arcB</i> (ornithine carbamoyltransferase).                                                                                                                                                                                                                                                                                                                                                        |
| PNRC200    | 249,147   | 249,157   | 11 bp (1→2) | TSD: coding                            | [ <i>arcR</i> ←]                          | Starts and ends in <i>arcR</i> (transcription regulator).                                                                                                                                                                                                                                                                                                                                                                                                                                   |
| PNRC200    | 262,603   | 265,437   | Δ2835 bp    | ISH 3-2, 8-3 mediated/ ISH 8-3 deleted | ( <i>vng6329</i> ←) / (→ <i>vng6330</i> ) | Starts before <i>vng6329</i> and ends after <i>vng6330</i> .                                                                                                                                                                                                                                                                                                                                                                                                                                |
| PNRC200    | 309,256   | 309,812   | Δ557 bp     | ISH 2, 8-3 mediated                    | ( <i>vng6393</i> ←) - (← <i>vng6395</i> ) | Starts before <i>vng6393</i> and ends before <i>vng6395</i> .                                                                                                                                                                                                                                                                                                                                                                                                                               |
| PNRC200    | 311,213   | 323,320   | Δ12108 bp   | ISH 8-3, 11 mediated                   | ( <i>nbp3</i> →) - (← <i>vng6420</i> )    | Starts before <i>nbp3</i> (nucleic acid binding protein), includes <i>vng6397</i> , <i>vng6400</i> , <i>vng6401</i> , <i>arlR20</i> (transcriptional regulator), <i>rfa6</i> (replication factor A related protein - <i>rfa32</i> ), <i>vng6404</i> , <i>vng6406</i> , <i>vng6407</i> , <i>phzF</i> (phenazine biosynthetic protein, <i>vng6409</i> , <i>vng6411</i> , <i>vng6412</i> , <i>vng6413</i> , <i>vng6416</i> , <i>vng6418</i> , <i>vng6419</i> , and ends after <i>vng6420</i> . |
| PNRC200    | 324,386   | 332,792   | Δ8407 bp    | ISH 11 mediated                        | ( <i>vng6424</i> ←) - (→ <i>vng6441</i> ) | Starts before <i>vng6424</i> , includes <i>vng6427</i> , <i>vng6429</i> , <i>vng6430</i> , <i>vng6431</i> , <i>vng6432</i> , <i>vng6434</i> , <i>tbpF</i> (transcription initiation factor IID), <i>vng6439</i> , and ends after <i>vng6441</i> .                                                                                                                                                                                                                                           |

\* “Annotation” column code: “ISH \*\*\* mediated” = flanking ISH elements, if relevant, TSD = target site duplication of ISH element insertion, **missense mutations in blue**.

“Gene” column code: (mutation starts or ends before this gene name), → ← indicates gene directionality, [mutation starts, ends, or is entirely contained within this gene name], “-” indicates intervening omitted genes found in description, “/” indicates mutation is between two genes.

† Highlight indicates mutation unique to J3-1.

**Table 7: Change in gas vesicle phenotype during evolution across populations\***

| Media condition                                    | Strain | Generation           |                      |     |                    |                    |
|----------------------------------------------------|--------|----------------------|----------------------|-----|--------------------|--------------------|
|                                                    |        | 100                  | 200                  | 300 | 400                | 500                |
| pH 6.3<br>100 mM PIPES                             | J1     | +                    | Vac <sup>+/-</sup>   | -   | -                  | -                  |
|                                                    | J2     | +                    | Vac <sup>+/-</sup>   | -   | -                  | Vac <sup>+/-</sup> |
|                                                    | J3     | >1% Vac <sup>-</sup> | Vac <sup>+/-</sup>   | -   | -                  | Vac <sup>+/-</sup> |
|                                                    | J4     | +                    | +                    | -   | -                  | Vac <sup>+/-</sup> |
| pH 7.5<br>100 mM MOPS                              | M1     | +                    | +                    | +   | Vac <sup>+/-</sup> | Vac <sup>+/-</sup> |
|                                                    | M2     | +                    | +                    | +   | Vac <sup>+/-</sup> | Vac <sup>+/-</sup> |
|                                                    | M3     | +                    | +                    | +   | Vac <sup>+/-</sup> | Vac <sup>+/-</sup> |
|                                                    | M4     | +                    | >1% Vac <sup>-</sup> | +   | +                  | Vac <sup>+/-</sup> |
| pH 6.3<br>100 mM PIPES<br>600 μM FeSO <sub>4</sub> | K1     | +                    | Vac <sup>+/-</sup>   | -   | Vac <sup>+/-</sup> | Vac <sup>+/-</sup> |
|                                                    | K2     | Vac <sup>+/-</sup>   | Vac <sup>+/-</sup>   | -   | -                  | Vac <sup>+/-</sup> |
|                                                    | K3     | +                    | Vac <sup>+/-</sup>   | -   | -                  | Vac <sup>+/-</sup> |
|                                                    | K4     | +                    | Vac <sup>+/-</sup>   | -   | -                  | Vac <sup>+/-</sup> |
| pH 7.5<br>100 mM MOPS<br>600 μM FeSO <sub>4</sub>  | S1     | +                    | +                    | -   | -                  | -                  |
|                                                    | S2     | +                    | +                    | -   | -                  | -                  |
|                                                    | S3     | +                    | +                    | -   | -                  | -                  |
|                                                    | S4     | +                    | +                    | +   | -                  | -                  |

\* “+” indicates gas vesicle-forming, “-” indicates non gas vesicle-forming

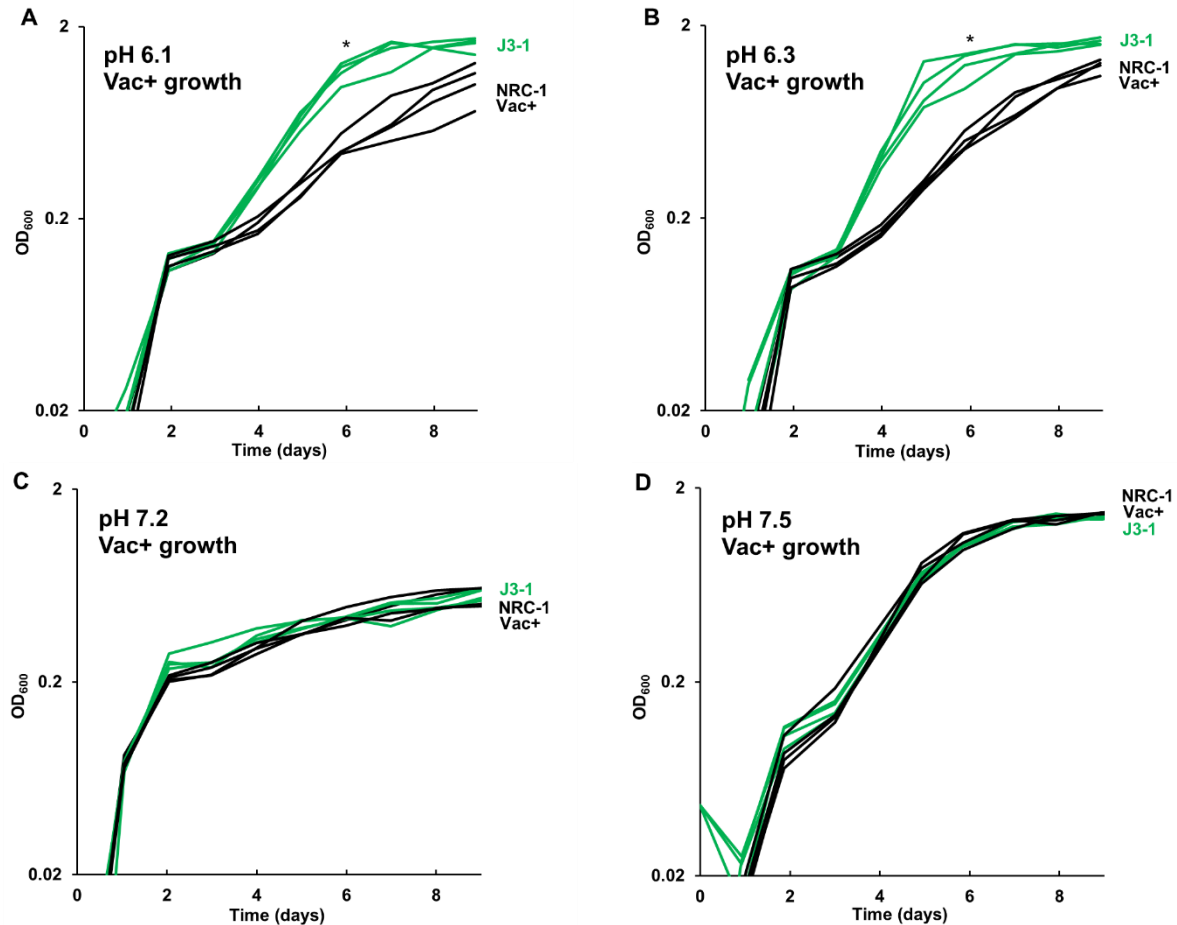

**Figure 1. Acid-evolved clone J3-1 shows a pH-dependent growth rate increase compared to NRC-1.** Growth medium was CM<sup>+</sup> buffered at (A) pH 6.1 with 100 mM PIPES; (B) pH 6.3 with 100 mM PIPES; (C) pH 7.2 with 100 mM MOPS; or (D) pH 7.5 with 100 mM MOPS. Representative curves of three replicates are shown. For J3-1 and NRC-1, the OD<sub>600</sub> values at 144 h were compared by two-tailed t-test. At pH 6.1, P = 0.002; at pH 6.3, P = 0.01; at pH 7.2, P = 0.91; at pH 7.5, P = 0.45. “\*” indicates significant endpoint growth increase from NRC-1 ancestor in at least 2 replicates.

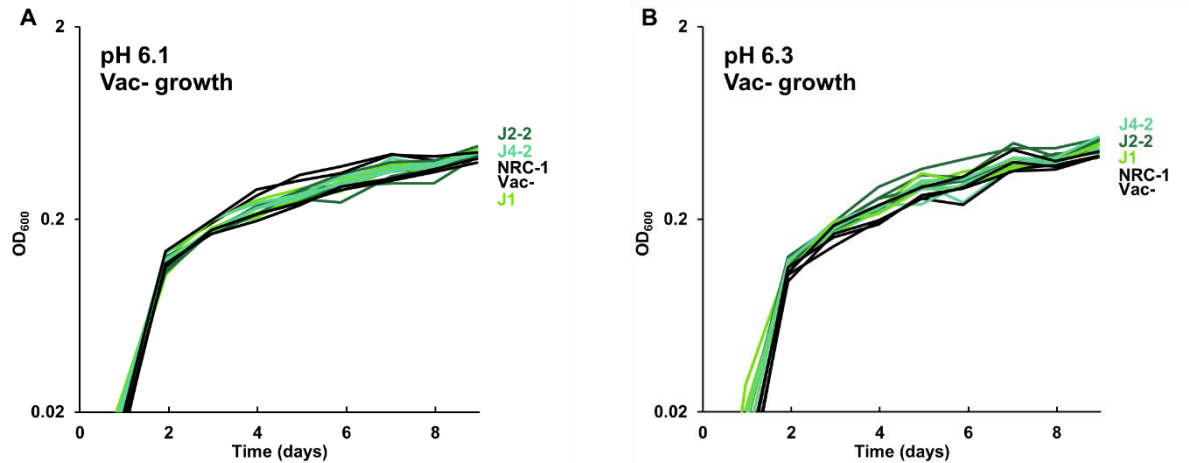

**Figure 2. Growth of acid-evolved clones J1, J2-2, J4-2.** Growth medium was CM<sup>+</sup> pH 6.3 with 100 mM PIPES, at (A) pH 6.1, (B) pH 6.3. Cultures were diluted from a 7-day culture in CM<sup>+</sup> pH 7.2. Gas vesicle-deficient clones were compared to gas vesicle-deficient ancestral mutant NRC-1 and cell density values post log-phase (OD<sub>600</sub> at 6 days) were analyzed using ANOVA with Tukey post-hoc. Representative curves of three replicates are shown.

## REFERENCES

1. Oren A. 2013. Life at high salt concentrations, intracellular KCl concentrations, and acidic proteomes. *Front Microbiol* 4:1–6.
2. Reysenbach A, Pace NR. 1995. *Archaea: A laboratory manual - Halophiles*. Cold Spring Harbor Laboratory Press, Cold Spring Harbor.
3. Ng W V., Kennedy SP, Mahairas GG, Berquist B, Pan M, Shukla HD, Lasky SR, Baliga NS, Thorsson V, Sbrogna J, Swartzell S, Weir D, Hall J, Dahl TA, Welti R, Goo YA, Leithauser B, Keller K, Cruz R, Danson MJ, Hough DW, Maddocks DG, Jablonski PE, Krebs MP, Angevine CM, Dale H, Isenbarger TA, Peck RF, Pohlschroder M, Spudich JL, Jung K-H, Alam M, Freitas T, Hou S, Daniels CJ, Dennis PP, Omer AD, Ebhardt H, Lowe TM, Liang P, Riley M, Hood L, DasSarma S. 2000. Genome sequence of *Halobacterium* species NRC-1. *Proc Natl Acad Sci* 97:12176–12181.
4. Kish A, Kirkali G, Robinson C, Rosenblatt R, Jaruga P, Dizdaroglu M, Diruggiero J. 2009. Salt shield: Intracellular salts provide cellular protection against ionizing radiation in the halophilic archaeon, *Halobacterium salinarum* NRC-1. *Environ Microbiol* 11:1066–1078.
5. Jones DL, Baxter BK. 2017. DNA repair and photoprotection: Mechanisms of overcoming environmental ultraviolet radiation exposure in halophilic archaea. *Front Microbiol* 8:1882.
6. Coker JA, DasSarma P, Kumar J, Müller JA, DasSarma S. 2007. Transcriptional profiling of the model archaeon *Halobacterium* sp. NRC-1: Responses to changes in salinity and temperature. *Saline Systems* 3:doi:10.1186/1746-1448-3-6.
7. Wang G, Kennedy SP, Fasiludeen S, Rensing C, DasSarma S. 2004. Arsenic resistance in *Halobacterium* sp. strain NRC-1 examined by using an improved gene knockout system. *J Bacteriol* 186:3187–3194.
8. DasSarma P, Tuel K, Nierenberg SD, Phillips T, Pecher WT, Nrc- H, Nierenberg SD, DasSarma S. 2016. Inquiry-driven teaching & learning using the archaeal microorganism *Halobacterium*. *Am Biol Teach* 78:7–13.
9. DasSarma S. 2006. Extreme halophiles are models for astrobiology. *Microbe* 1:120–126.
10. Leuko S, Domingos C, Parpart A, Reitz G, Rettberg P. 2015. The survival and resistance of *Halobacterium salinarum* NRC-1, *Halococcus hamelinensis*, and *Halococcus morrhuae* to simulated outer space solar radiation. *Astrobiology* 15:987–997.
11. DasSarma P, Laye VJ, Harvey J, Reid C, Shultz J, Yarborough A, Lamb A, Koske-Phillips A, Herbst A, Molina F, Grah O, Phillips T, DasSarma S. 2017. Survival of halophilic archaea in Earth's cold stratosphere. *Int J Astrobiol* 16:321–327.
12. DasSarma P, DasSarma S. 2018. Survival of microbes in Earth's stratosphere. *Curr Opin Microbiol* 43:24–30.
13. Madden MEE, Bodnar RJ, Rimstidt JD. 2004. Jarosite as an indicator of water- limited chemical weathering on Mars. *Nature* 431:821–823.
14. Pritchett BN, Elwood Madden ME, Madden AS. 2014. Jarosite dissolution rates and maximum lifetimes in high salinity brines: Implications for Earth and Mars. *Earth Planet Sci Lett* 391:67–68.
15. Dopson M, Ossandon FJ, Lövgren L, Holmes DS. 2014. Metal resistance or tolerance? Acidophiles confront high metal loads via both abiotic and biotic mechanisms. *Front Microbiol* 5:doi: 10.3389/fmicb.2014.00157.

16. Moran-Reyna A, Coker JA. 2014. The effects of extremes of pH on the growth and transcriptomic profiles of three haloarchaea. *F1000 Res* 3:1–15.
17. Lenski RE, Travisano M. 1994. Dynamics of adaptation and diversification: A 10,000-generation experiment with bacterial populations. *Proc Natl Acad Sci U S A* 91:6808–14.
18. Lenski RE, Rose MR, Simpson SC, Tadler SC. 1991. Long-term experimental evolution in *Escherichia coli*. I. Adaptation and divergence during 2,000 generations. *Am Nat* 138:1315–1341.
19. Tenaillon O, Barrick JE, Ribeck N, Deatherage DE, Blanchard JL, Dasgupta A, Wu GC, Schneider D, Lenski RE. 2016. Tempo and mode of genome evolution in a 50,000 - generation experiment. *Nature* 536:165–170.
20. Creamer KE, Ditmars FS, Basting PJ, Kunka KS, Hamdallah IN, Bush SP, Scott Z, He A, Penix SR, Gonzales AS, Eder EK, Camperchioli DW, Berndt A, Clark MW, Rouhier KA, Slonczewski JL. 2017. Benzoate- and salicylate-tolerant strains of *Escherichia coli* K-12 lose antibiotic resistance during laboratory evolution. *Appl Environ Microbiol* 83:e02736.
21. He A, Penix SR, Basting PJ, Griffith JM, Creamer KE, Camperchioli D, Clark MW, Gonzales AS, Erazo JSC, George NS, Bhagwat AA, Slonczewski JL. 2017. Acid evolution of *Escherichia coli* K-12 eliminates amino acid decarboxylases and reregulates catabolism. *Appl Environ Microbiol* 83:e00442-17.
22. Harden MM, He A, Creamer K, Clark MW, Hamdallah I, Martinez KA, Kresslein RL, Bush SP, Slonczewski JL. 2015. Acid-adapted strains of *Escherichia coli* K-12 obtained by experimental evolution. *Appl Environ Microbiol* 81:1932–1941.
23. Schou MF, Kristensen TN, Kellermann V, Schlötterer C, Loeschcke V. 2014. A *Drosophila* laboratory evolution experiment points to low evolutionary potential under increased temperatures likely to be experienced in the future. *J Evol Biol* 27:1859–1868.
24. Slonczewski JL, Fujisawa M, Dopson M, Krulwich TA. 2009. Cytoplasmic pH measurement and homeostasis in bacteria and archaea., p. 1–79, 317. *In* *Advances in Microbial Physiology*.
25. Kanjee U, Houry WA. 2013. Mechanisms of acid resistance in *Escherichia coli*. *Annu Rev Microbiol* 67:65–81.
26. Hamdallah I, Torok N, Bischof KM, Majdalani N, Chadalavada S, Mdluli N, Creamer KE, Clark M, Holdener C, Basting PJ, Gottesman S, Slonczewski JL. 2018. Experimental evolution of *Escherichia coli* K-12 at high pH and RpoS induction. *Appl Environ Microbiol* 84:e00520.
27. DeVaux LC, Müller JA, Smith J, Petrisko J, Wells DP, DasSarma S. 2007. Extremely radiation-resistant mutants of a halophilic archaeon with increased single-stranded DNA-binding protein (RPA) gene expression. *Radiat Res* 168:507–514.
28. McCarthy S, Johnson T, Pavlik BJ, Payne S, Schackwitz W, Martin J, Lipzen A, Keffeler E, Blum P. 2016. Expanding the limits of thermoacidophily in the archaeon *Sulfolobus solfataricus* by adaptive evolution. *Appl Environ Microbiol* 82:857–867.
29. Ai C, McCarthy S, Eckrich V, Rudrappa D, Qiu G, Blum P. 2016. Increased acid resistance of the archaeon, *Metallosphaera sedula* by adaptive laboratory evolution. *J Ind Microbiol Biotechnol* 43:1455–1465.
30. Krulwich TA, Sachs G, Padan E. 2011. Molecular aspects of bacterial pH sensing and homeostasis. *Nat Rev Microbiol* 9:330–343.
31. Lund P, Tramonti A, De Biase D. 2014. Coping with low pH: Molecular strategies in neutralophilic bacteria. *FEMS Microbiol Rev* 38:1091–1125.



32. Simsek M, DasSarma S, RajBhandary U, Khorana H. 2006. A transposable element from *Halobacterium halobium* which inactivates the bacteriorhodopsin gene. *Proc Natl Acad Sci* 79:7268–7272.
33. Dummer AM, Bonsall JC, Cihla JB, Lawry SM, Johnson GC, Peck RF. 2011. Bacterioopsin-mediated regulation of bacterioruberin biosynthesis in *Halobacterium salinarum*. *J Bacteriol* 193:5658–5667.
34. Ito M, Guffanti AA, Zemsy J, Ivey DM, Krulwich TA. 1997. Role of the *nhaC*-encoded Na<sup>+</sup>/H<sup>+</sup> antiporter of alkaliphilic *Bacillus firmus* OF4. *J Bacteriol* 179:3851–3857.
35. Padan E, Bibi E, Ito M, Krulwich TA. 2005. Alkaline pH homeostasis in bacteria: New insights. *Biochim Biophys Acta - Biomembr* 1717:67–88.
36. Ng WL, Ciufo SA, Smith TM, Bumgarner RE, Baskin D, Faust J, Hall B, Loretz C, Seto J, Slagel J, Hood L, DasSarma S. 1998. Snapshot of a large dynamic replicon in a halophilic archaeon: Megaplasmid or minichromosome? *Genome Res* 8:1131–1141.
37. DasSarma S. 1989. Mechanisms of genetic variability in *Halobacterium halobium*: The purple membrane and gas vesicle mutations. *Can J Microbiol* 35:65–72.
38. Sapienza C, Doolittle WF. 1982. Unusual physical organization of the *Halobacterium* genome. *Nature* 295:384–389.
39. Deatherage DE, Barrick JE. 2014. Identification of mutations in laboratory-evolved microbes from next-generation sequencing data using *breseq*. *Methods Mol Biol* 1151:165–188.
40. Deatherage DE, Traverse CC, Wolf LN, Barrick JE. 2015. Detecting rare structural variation in evolving microbial populations from new sequence junctions using *breseq*. *Front Genet* 5:1–16.
41. Barrick JE, Colburn G, Deatherage DE, Traverse CC, Strand MD, Borges JJ, Knoester DB, Reba A, Meyer AG. 2014. Identifying structural variation in haploid microbial genomes from short-read resequencing data using *breseq*. *BMC Genomics* 15:1039.
42. DasSarma S, Halladay JT, Jones JG, Donovan JW, Giannasca PJ, de Marsac NT. 1988. High-frequency mutations in a plasmid-encoded gas vesicle gene in *Halobacterium halobium*. *Proc Natl Acad Sci U S A* 85:6861–5.
43. Ng WL, DasSarma S. 1991. Physical and genetic mapping of the unstable gas vesicle plasmid in *Halobacterium halobium* NRC-1, p. 305–311. *In* Rodriguez-Valera, F (ed.), *General and Applied Aspects of Halophilic Microorganisms*. Plenum Press.
44. Ng WL, Kothakota S, DasSarma S. 1991. Structure of the gas vesicle plasmid in *Halobacterium halobium*: Inversion isomers, inverted repeats, and insertion sequences. *J Bacteriol* 173:1958–1964.
45. Ng WL, Arora P, DasSarma S. 1993. Large deletions in class III gas vesicle-deficient mutants of *Halobacterium halobium*. *Syst Appl Microbiol* 16:560–568.
46. Pfeiffer F, Schuster SC, Broicher A, Falb M, Palm P, Rodewald K, Ruepp A, Soppa J, Tittor J, Oesterhelt D. 2008. Evolution in the laboratory: The genome of *Halobacterium salinarum* strain R1 compared to that of strain NRC-1. *Genomics* 91:335–346.
47. Soppa J. 2013. Evolutionary advantages of polyploidy in halophilic archaea. *Biochem Soc Trans* 41:339–343.
48. DasSarma S, Arora P. 1997. Genetic analysis of the gas vesicle gene cluster in haloarchaea. *FEMS Microbiol Lett* 153:1–10.
49. DasSarma P, Zamora RC, Müller JA, DasSarma S. 2012. Genome-wide responses of the model archaeon *Halobacterium* sp. strain NRC-1 to oxygen limitation. *J Bacteriol*

- 194:5530–5537.
50. DasSarma S, Arora P, Lin F, Molinari E, Yin LRS. 1994. Wild-type gas vesicle formation requires at least ten genes in the *gvp* gene cluster of *Halobacterium halobium* plasmid pNRC100. *J Bacteriol* 176:7646–7652.
  51. Ruepp A, Soppa J. 1996. Fermentative arginine degradation in *Halobacterium salinarum* (formerly *Halobacterium halobium*): Genes, gene products, and transcripts of the *arcRACB* gene cluster. *J Bacteriol* 178:4942–4947.
  52. Wimmer F, Oberwinkler T, Bisle B, Tittor J, Oesterhelt D. 2008. Identification of the arginine/ornithine antiporter ArcD from *Halobacterium salinarum*. *FEBS Lett* 582:3771–3775.
  53. Gong S, Richard H, Foster JW. 2003. YjdE (AdiC) is the arginine:agmatine antiporter essential for arginine-dependent acid resistance in *Escherichia coli*. *J Bacteriol* 185:4402–4409.
  54. Griffith JM, Basting PJ, Bischof KM, Wrona EP, Kunka KS, Tancredi A, Moore JP, Hyman M, Slonczewski JL. 2019. Experimental evolution of *Escherichia coli* K-12 in the presence of proton motive force (PMF) uncoupler carbonyl cyanide *m*-chlorophenylhydrazone selects for mutations affecting PMF-driven drug efflux pumps. *Appl Environ Microbiol* 85:e02792-18.
  55. Redder P, Garrett RA. 2006. Mutations and rearrangements in the genome of *Sulfolobus solfataricus* P2. *J Bacteriol* 188:4198–4206.
  56. Berquist BR, Müller JA, DasSarma S. 2006. 27 genetic systems for halophilic archaea. *Methods Microbiol* 35:649–680.
  57. Thorvaldsdóttir H, Robinson JT, Mesirov JP, Thorvaldsdóttir H, Robinson JT, Mesirov JP. 2013. Integrative genomics viewer (IGV): High-performance genomics data visualization and exploration. *Brief Bioinform* 14:178–192.
